# Supplementary material for: Facile generation of surface structures having opposite tone in metal-assisted chemical etching of Si: pillars vs. holes
Source: Royal Society of Chemistry journal article supplement (doi:10.1039/c3ra45729j), 2013-01-01
Supplement: c3ra45729j.pdf [file c3ra45729j.pdf]

*Electronic Supplementary Information for*

Facile generation of surface structures having opposite tone  
in metal-assisted chemical etching of Si: pillars vs. holes

Mi-Hwa Lee and Dahl-Young Khang

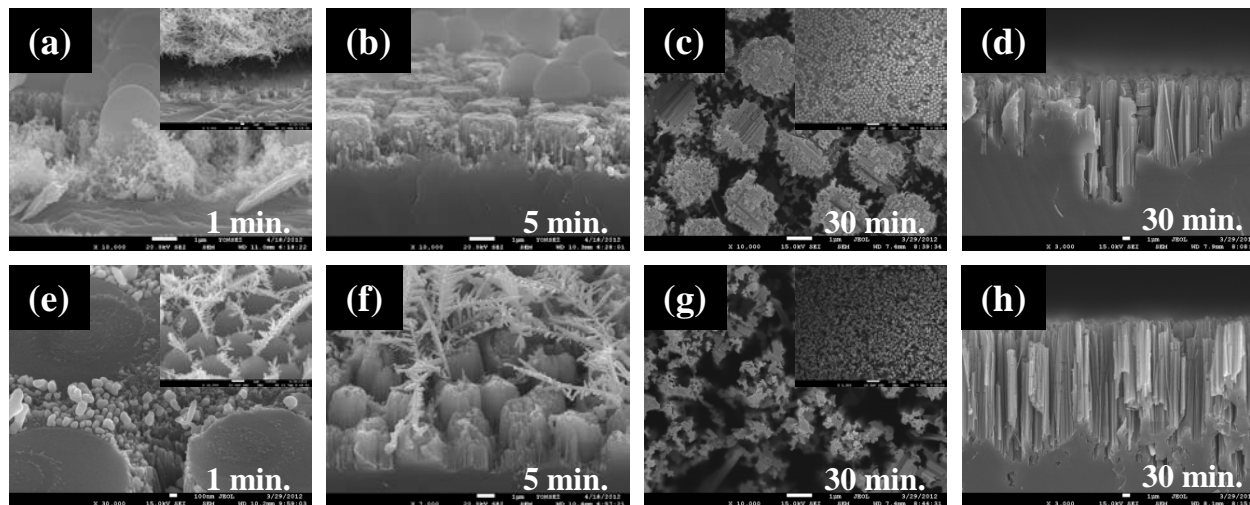

**Fig. S1** Etching evolution of Si by  $\text{AgNO}_3$ -based etching. (a to d)  $\text{AgNO}_3/\text{HF}/\text{H}_2\text{O}$  etching with PS colloidal monolayer mask, and (e to h) Ag nucleation with  $\text{AgNO}_3/\text{HF}/\text{H}_2\text{O}$  for 1 min. followed by  $\text{H}_2\text{O}_2/\text{HF}/\text{H}_2\text{O}$  etching. Scale bars are  $1\mu\text{m}$  for all images, but  $100\text{nm}$  for (e). Insets show large area view of the samples, and scale bars are  $1\mu\text{m}$  for (a) and (e), and  $10\mu\text{m}$  for (c) and (g), respectively.

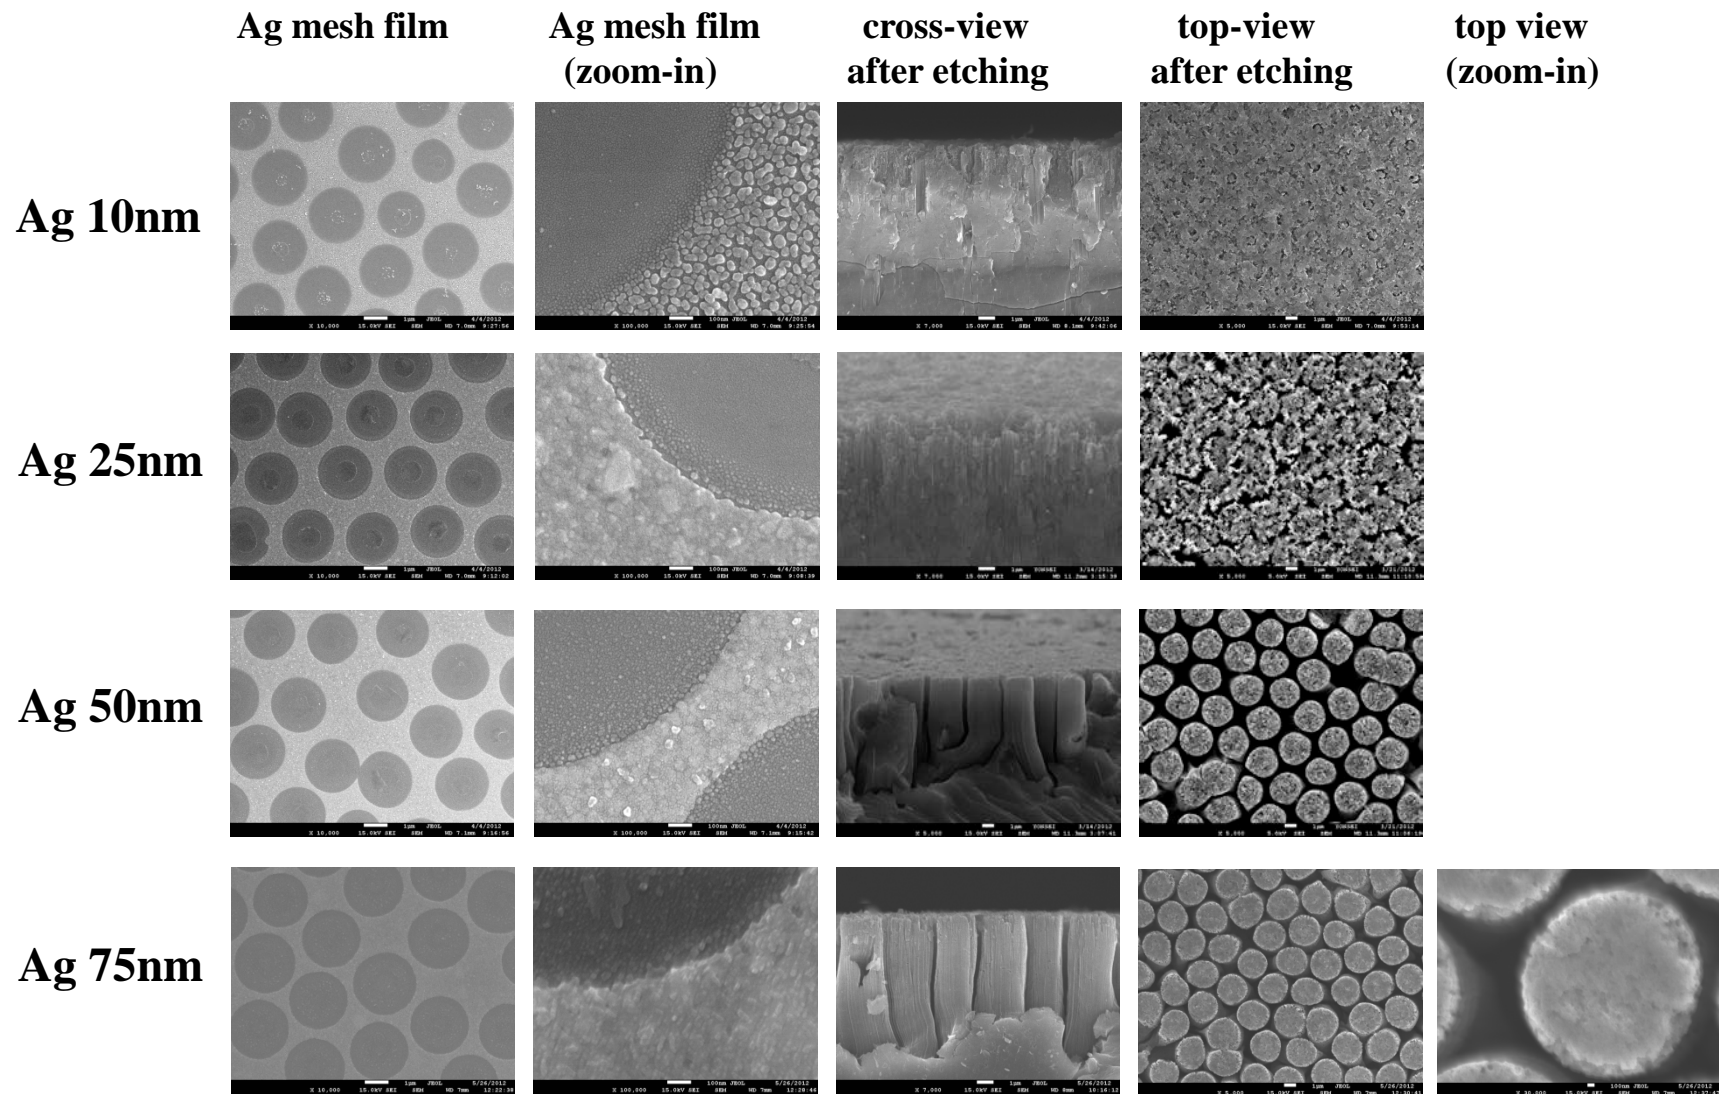

**Fig. S2.** Effect of deposited Ag thickness on the Si etching with H<sub>2</sub>O<sub>2</sub>/HF for 30min. For thin Ag films, thinner than ~30nm, no clear definition of pillar structure has been observed due to absence of connectedness or cohesion of Ag mesh film. As Ag thickness increases over 50nm, however, the clean pillar shape emerges. Note here that the uprightness of the Si pillars for thick Ag films improves as the thickness increases. At the same time, the pillar top becomes rough as the Ag film gets thicker. Considering these observations, the optimal thickness of Ag mesh seems to be 150~300nm.

**Ag mesh film**

**Ag mesh film  
(zoom-in)**

**cross-view  
after etching**

**top-view  
after etching**

**top view  
(zoom-in)**

**Ag 100nm**

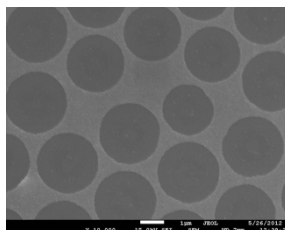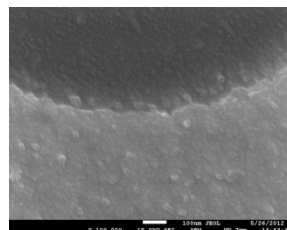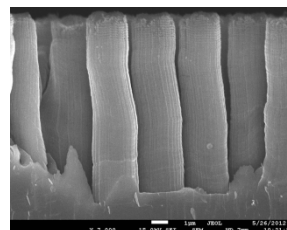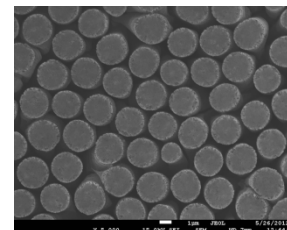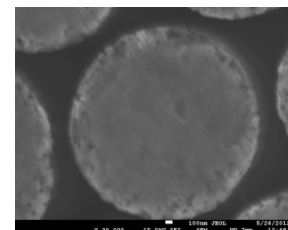

**Ag 150nm**

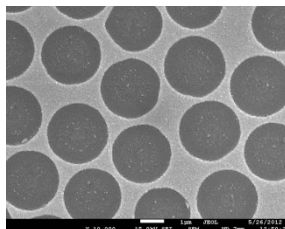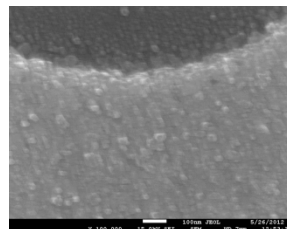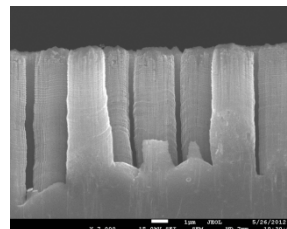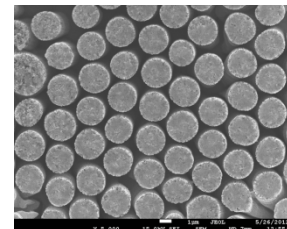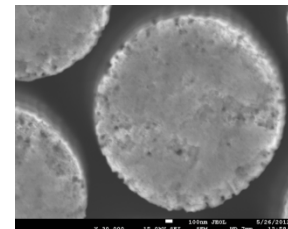

**Ag 200nm**

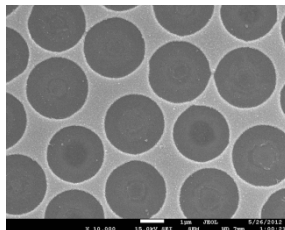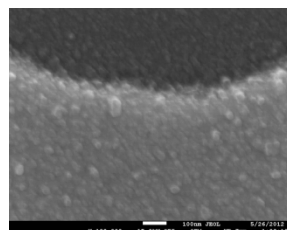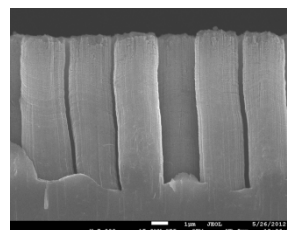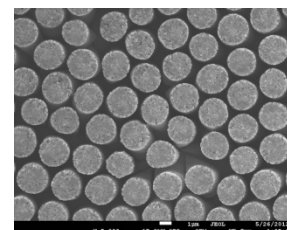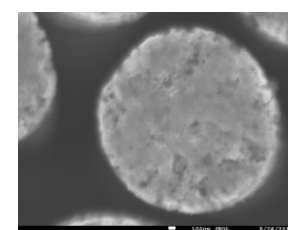

**Ag 300nm**

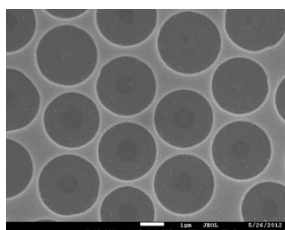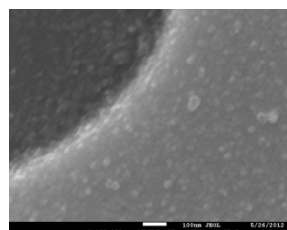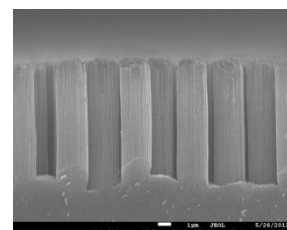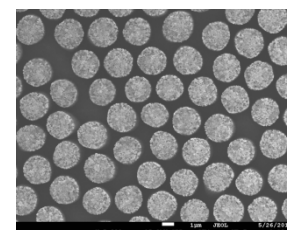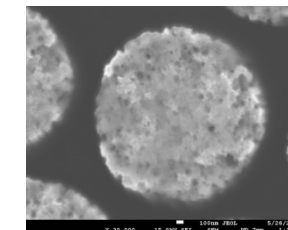

**Ag 500nm**

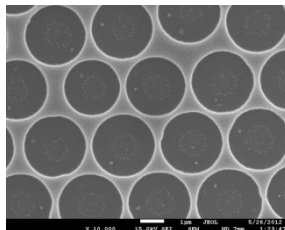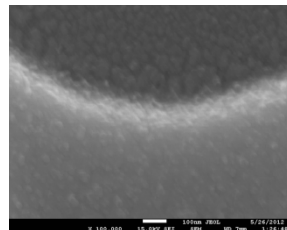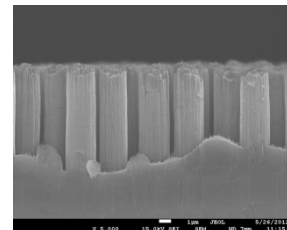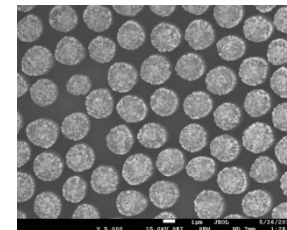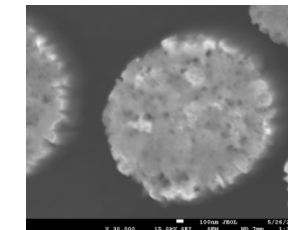

**Fig. S2 (continued).**

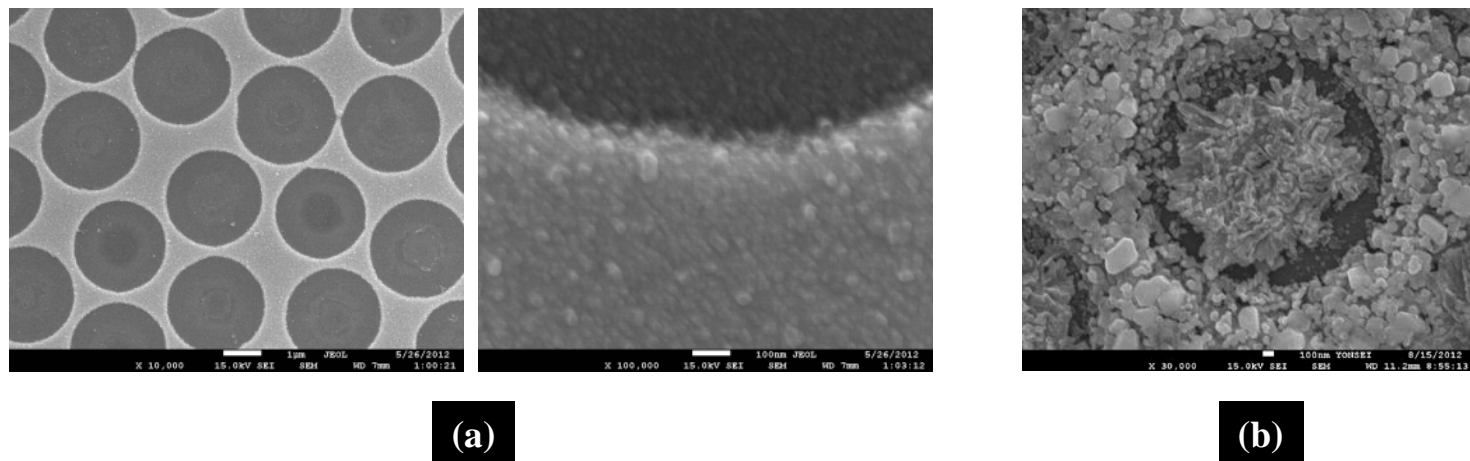

**Fig. S3** Morphology change of Ag(200nm) mesh film upon O<sub>2</sub> RIE treatment. (a) pristine Ag mesh film, and (b) after O<sub>2</sub> RIE treatment at 300W for 60sec. The Ag mesh film was severely damaged by RIE, which has led to easy delamination during MaCE, even at such lower thickness compared to critical thickness of ~600nm.

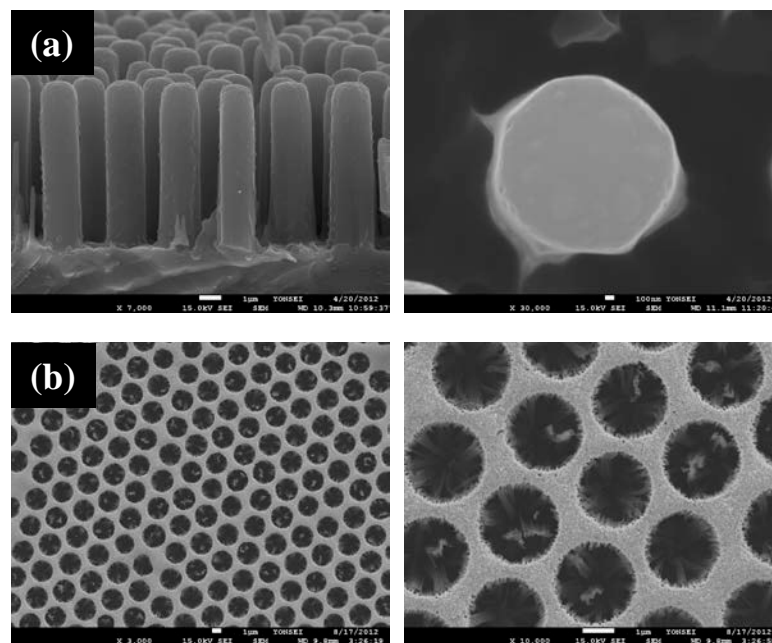

**Fig. S4** Improved surface roughness of Si structures by post-processing or bilayer metal mesh catalyst. (a) Si pillar arrays after dry thermal oxidation (1100°C, 1hr) and oxide strip by HF, and (b) Si hole arrays prepared by using bilayer of metal, Cr(100nm)/Ag(200nm). After O<sub>2</sub> RIE treatment, the empty holes were filled with sputtered and re-deposited Ag. Then the following MaCE has led to Cr/Ag mesh film delamination, leading to hole arrays etching. The Cr/Ag bilayer mesh protect the un-etched Si surface until it completely delaminated off the surface, resulting in the improved surface roughness.
